# Supplementary material for: Albumin nanocapsules and nanocrystals for efficient intracellular drug release
Source: Royal Society of Chemistry journal article supplement (doi:10.1039/d4nh00161c), 2024-01-01
Supplement: d4nh00161c1.pdf [file d4nh00161c1.pdf]

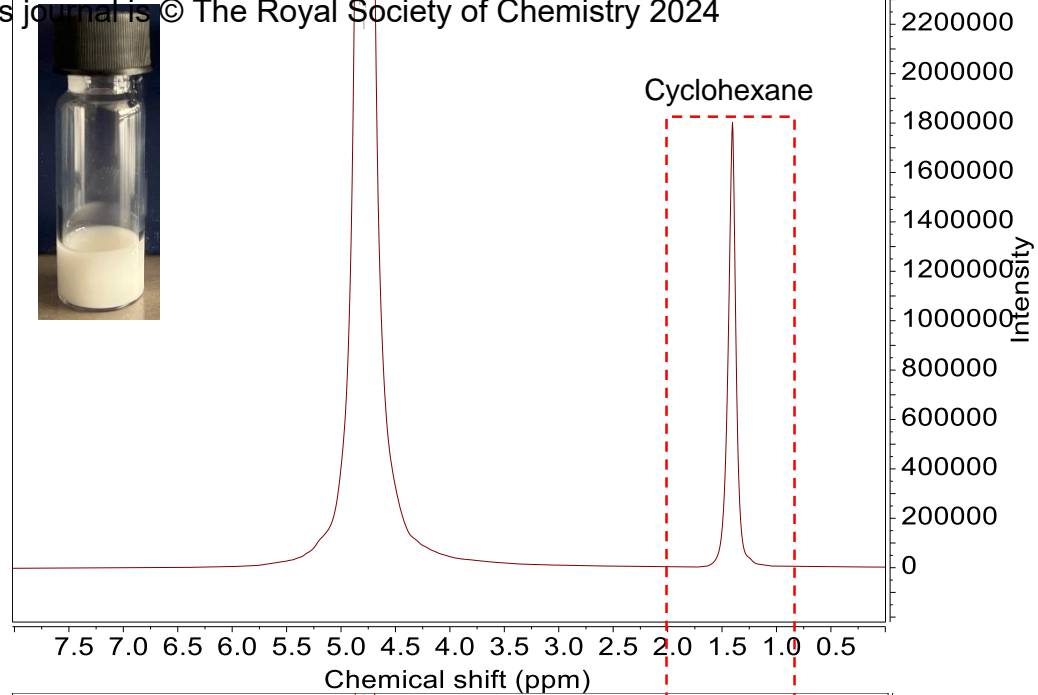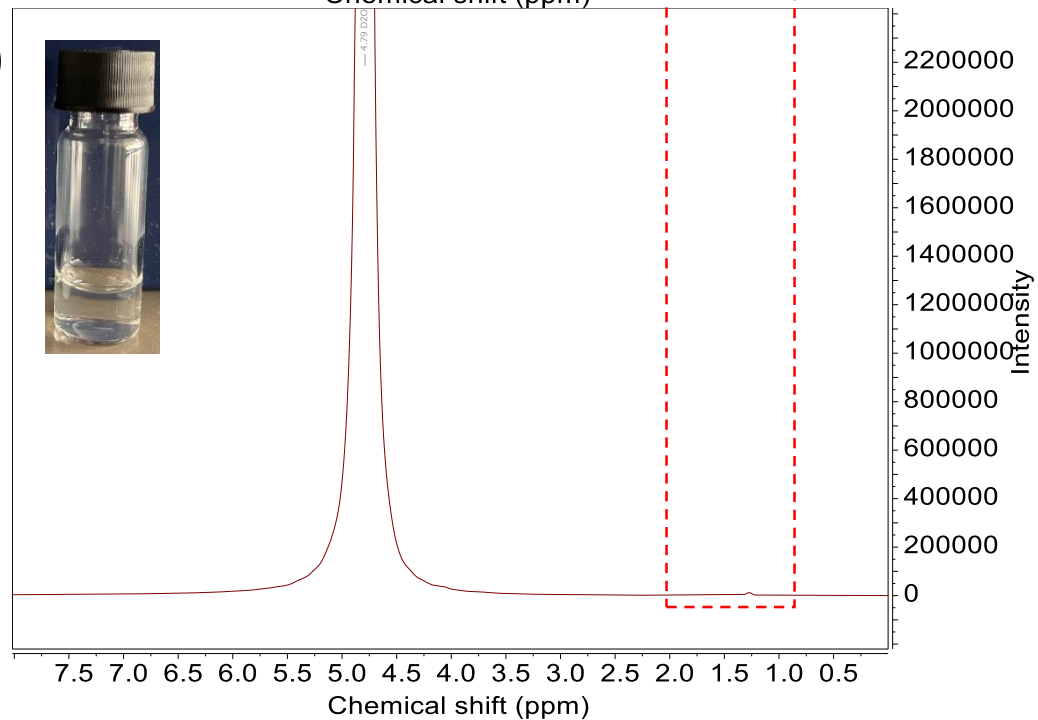

**Figure S1:**  $^1\text{H}$ -NMR spectra of nanocapsules in **A)** the beginning of redispersion process and **B)** after the evaporation of cyclohexane. NMR samples were prepared in 10%  $\text{D}_2\text{O}$ . The vial picture in **A)** shows the nanocapsule emulsion before and the vial in **B)** shows it after the evaporation of cyclohexane.

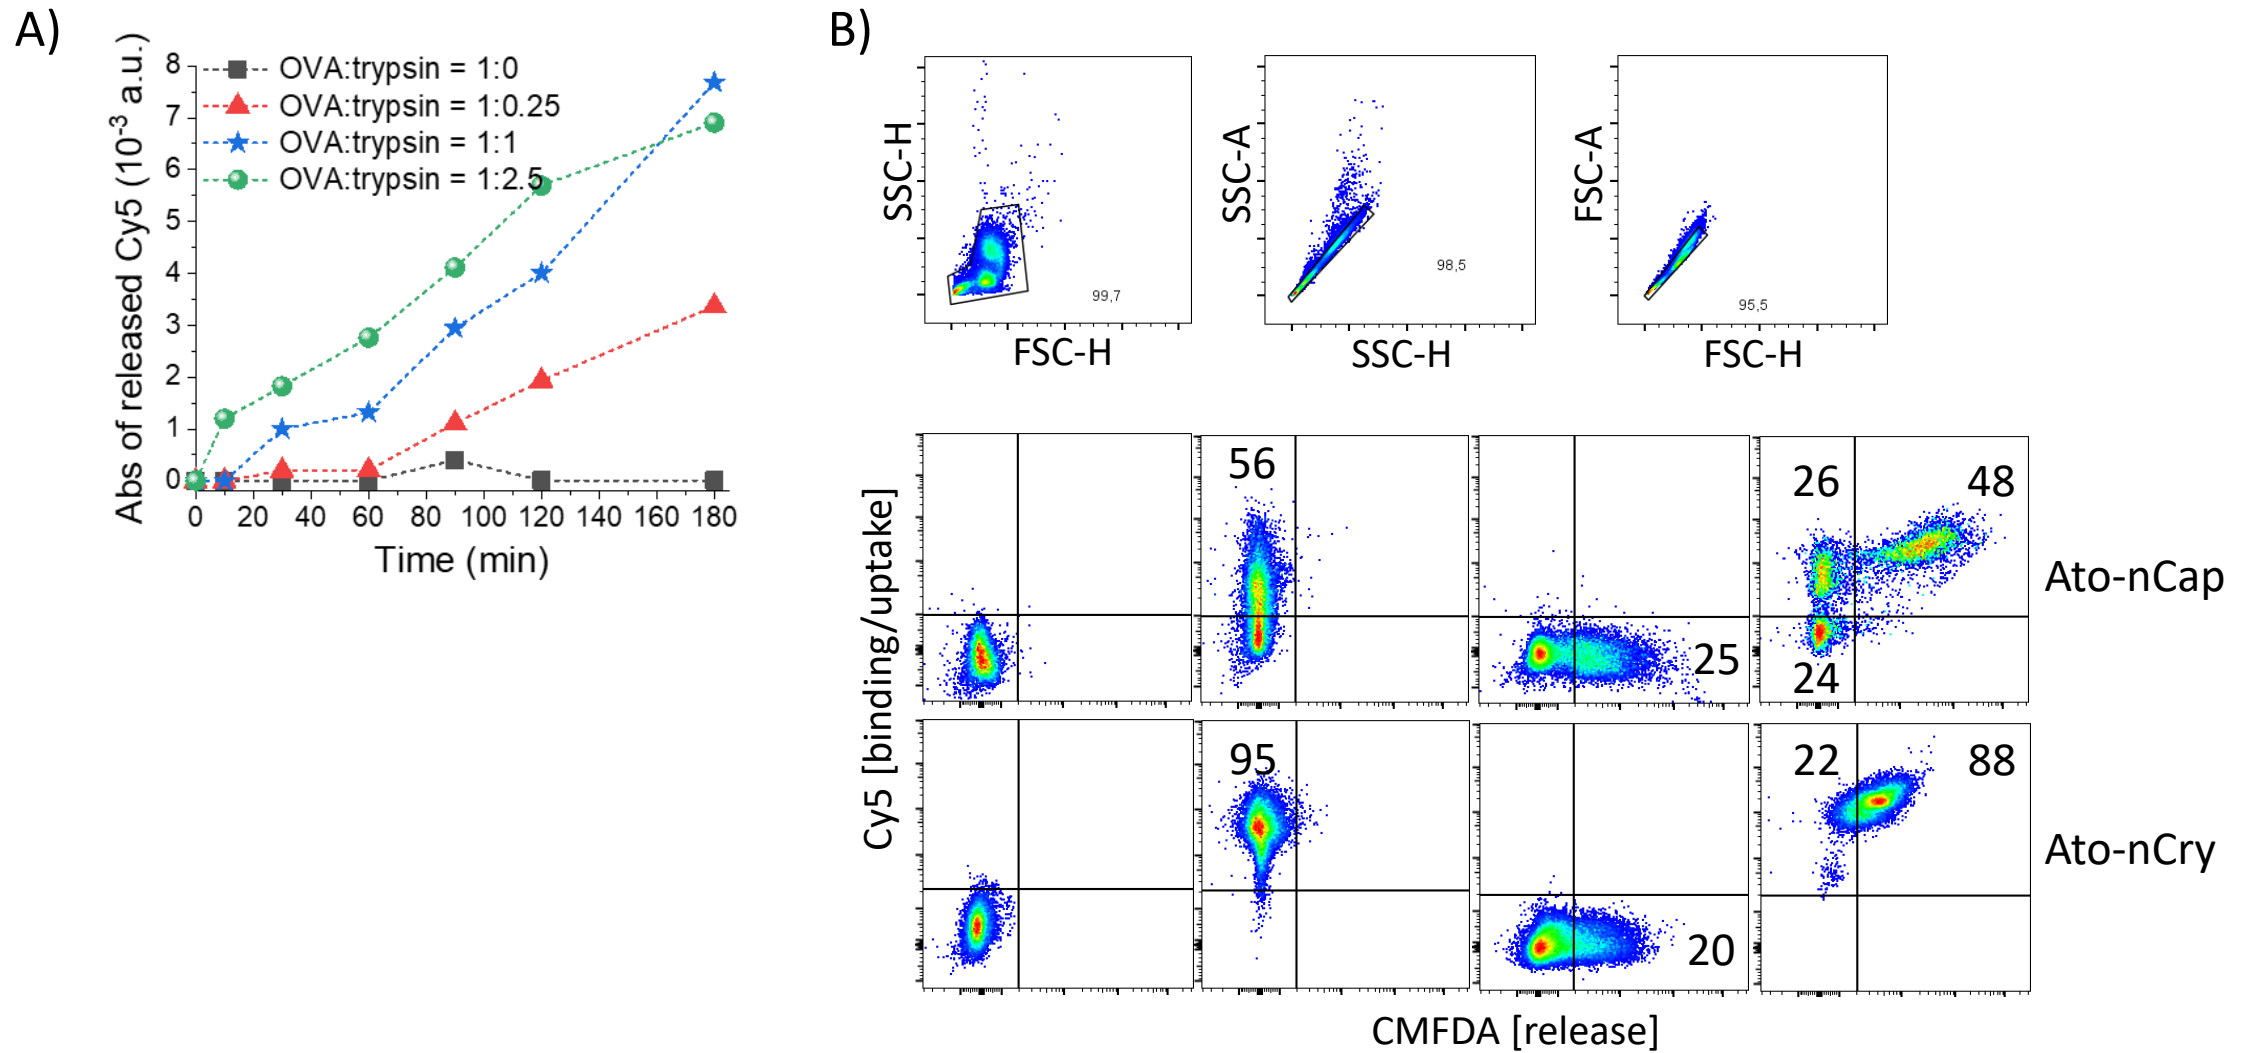

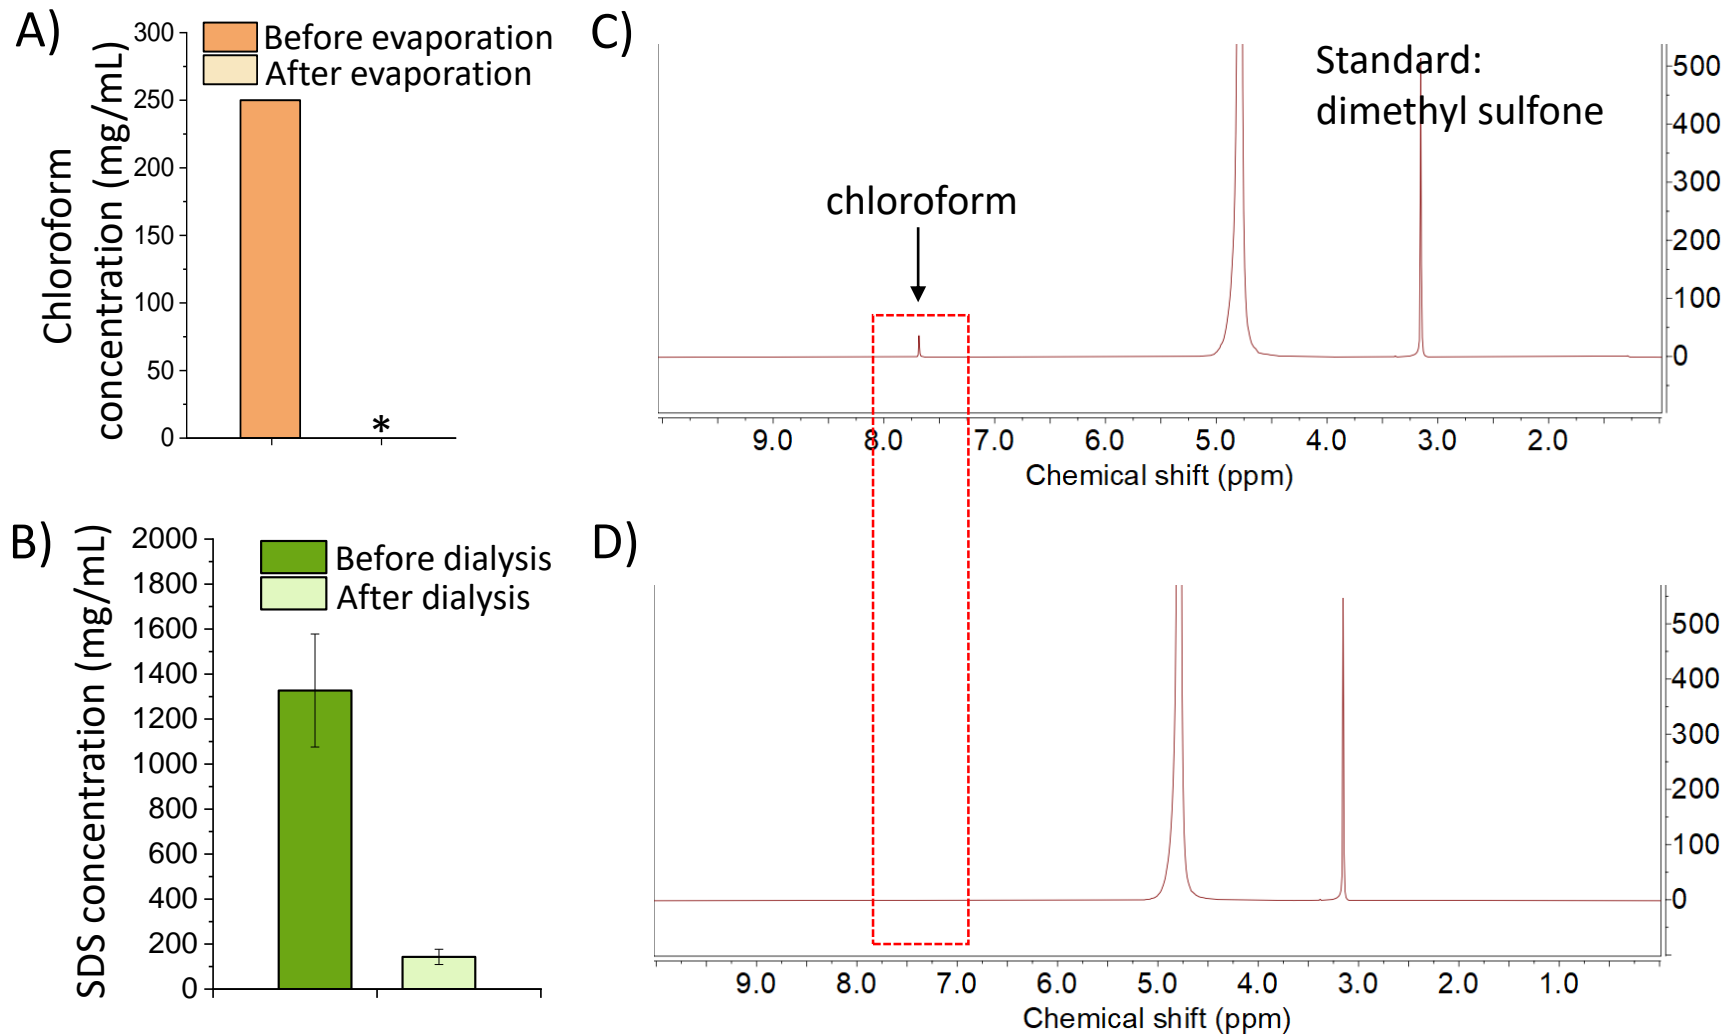

**Figure S3:** **A)** Concentration of chloroform before and after the solvent evaporation process obtained using  $^1\text{H-NMR}$  studies. **B)** SDS concentration in the dispersion before and after dialysis of the dispersion after human serum albumin addition. SDS was quantified using a carbocyanine dye, stains-all.  $^1\text{H-NMR}$  spectra of nanocrystal dispersion **C)** before and **D)** after solvent evaporation process. NMR measurements were performed by diluting  $100\ \mu\text{L}$  of nanocrystal dispersion with  $500\ \mu\text{L}$   $\text{D}_2\text{O}$  containing  $10\ \text{mg mL}^{-1}$  dimethyl sulfone as standard.

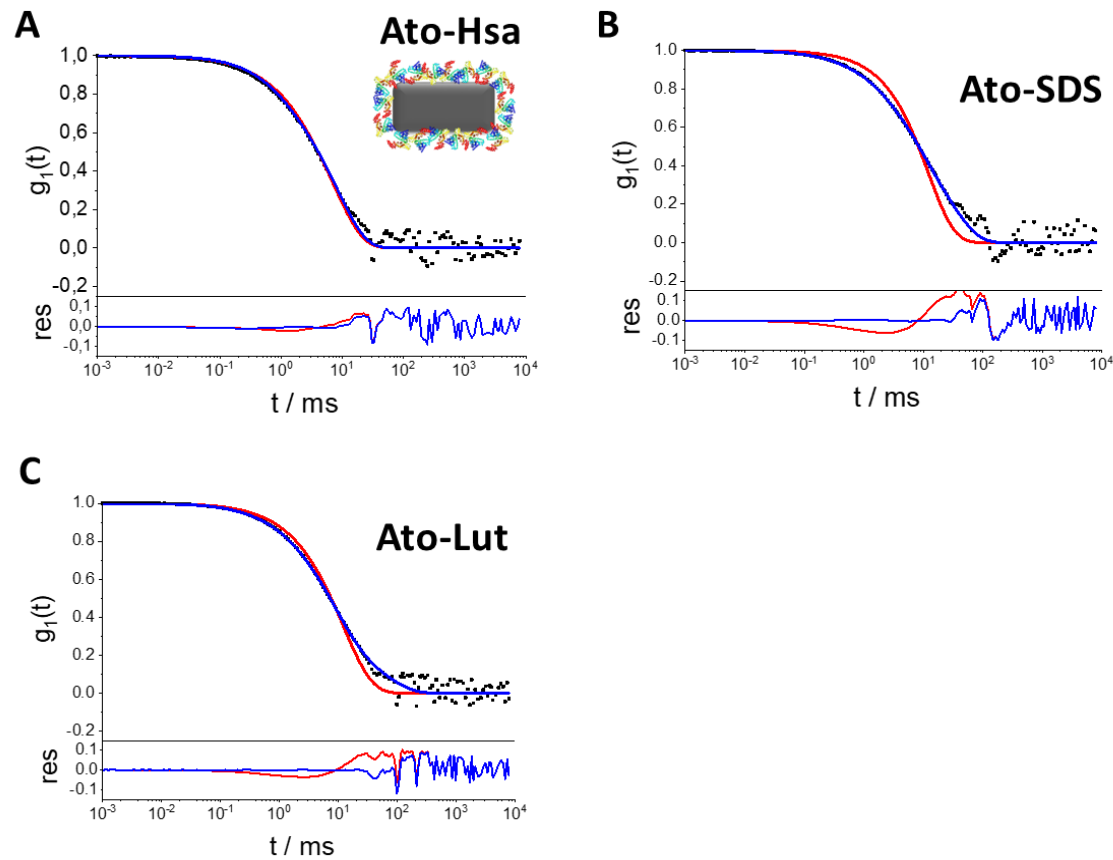

**Figure S4:** Autocorrelation functions (ACFs) of **A)** HSA-Ato-nCry and **B)** Ato-nCry stabilized with SDS and **C)** with Lutensol AT50 in human plasma at 37 °C. Upper graph: ACFs of Ato-nCry in human plasma, including data points, forced fit of ACFs of Ato-nCry and proteins (red curve), and fit with additional aggregate function (blue curve). Lower graphs: corresponding residuals resulting from the difference between data and the two fits. Scattering angle: 30°.

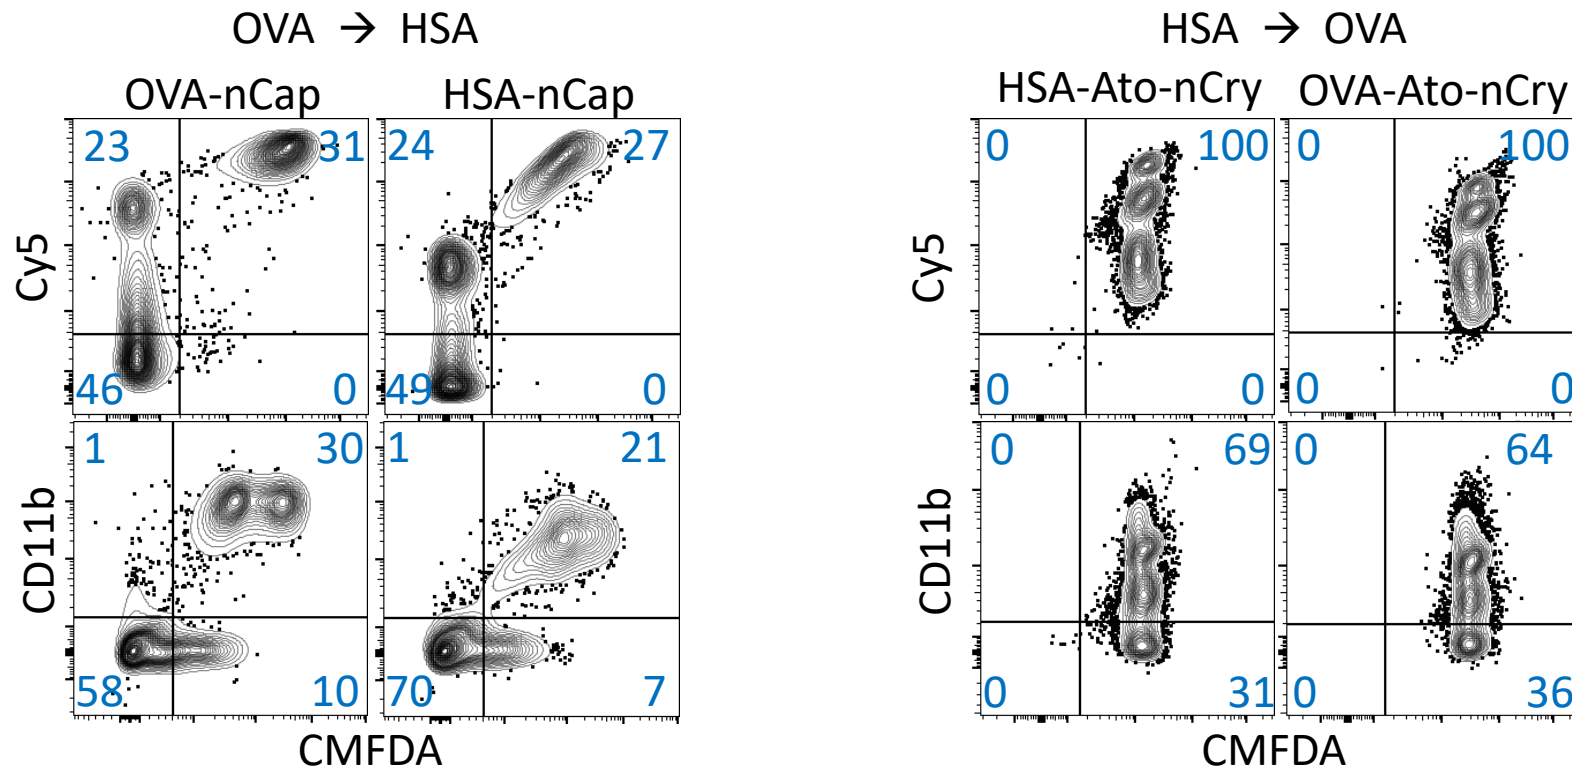

**Figure S5: Ato-nCap and Ato-nCry uptake and intracellular opening in immune cells is not determined by the envelope protein.** OVA-nCap and HSA-nCap as well as HSA-coated and OVA-coated Ato-nCry were incubated with PBMC for 10 h (5  $\mu$ M nanocarrier substance) and Cy5 and CMFDA fluorescence were determined by flow cytometry. Numbers indicate cell frequencies in gates. Flow cytometric plots are representative of two independent experiments.

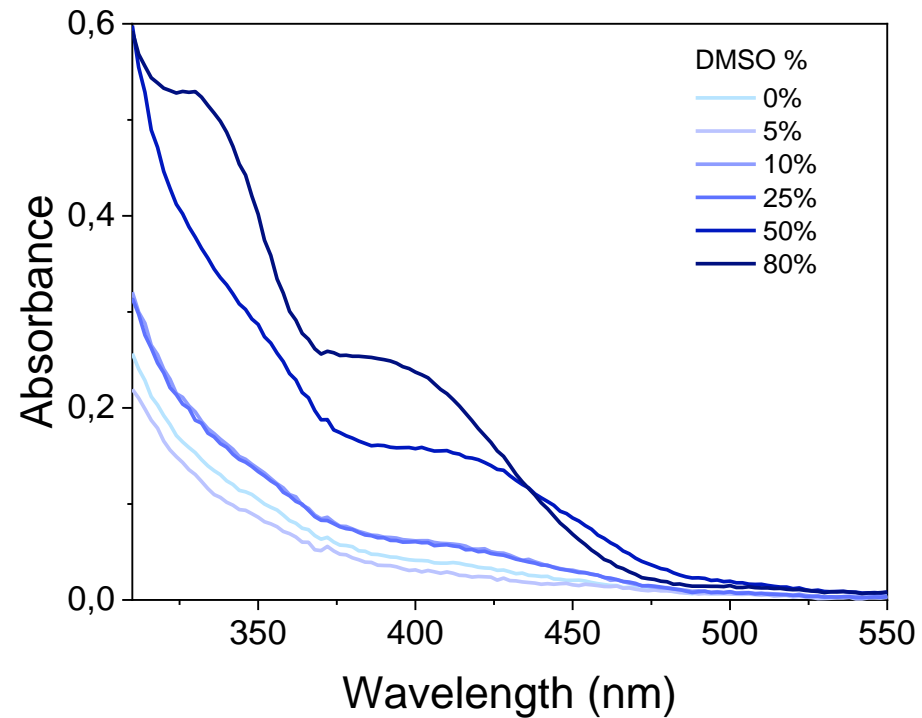

**Figure S6:** To check the effect of different % of DMSO in the dissolution or release of Atovaquone from Ato-nCry, 0, 5, 10, 25, 50, and 80% DMSO solutions of Ato-nCry (0.2 mg/mL) were shaken at 500 rpm at 37 °C for 1 h. To extract the dissolved or released Ato, the samples were centrifuged at 10,000 rpm for 20 min and absorbance spectra of the supernatant were recorded.
